# Supplementary material for: Novel host materials for single-component white organic light-emitting diodes based on 9-naphthylanthracene derivatives
Source: Royal Society of Chemistry journal article supplement (doi:10.1039/b806183a), 2008-01-01
Supplement: b806183a.pdf [file b806183a.pdf]

## Supporting information (SI)

### Novel host material for single-component white organic light-emitting diodes based on 9-naphthylanthracene derivatives

Lei Wang<sup>a</sup>, Wai-Yeung Wong<sup>a</sup>, Mei-Fang Lin<sup>a</sup>, Wai-Kwok Wong<sup>a\*</sup>, Kok-Wai Cheah<sup>b</sup>,  
Hoi-Lam Tam<sup>b</sup>, Chin H. Chen<sup>c\*</sup>

<sup>a</sup>*Centre for Advanced Luminescence Materials, Department of Chemistry, Hong Kong Baptist University, Waterloo Road, Hong Kong, P. R. China*

<sup>b</sup>*Centre for Advanced Luminescence Materials, Department of Physics, Hong Kong Baptist University, Waterloo Road, Hong Kong, P. R. China*

<sup>c</sup>*Display Institute, Microelectronics and Information Systems Research Center, National Chiao Tung University, Hsinchu, Taiwan 300, Republic of China*

#### **The definition of some related terms in the paper:**

Electromer is an excited state complex of a pair of molecules under electric excitation, in which one carried an excess electron while the other carried a hole; Exciplex is a metastable complex formed by associative excited state interactions between two different molecules; Excimer is a metastable complex formed by associative excited state interactions between two same molecules; Aggregate is the component of composite materials used to resist compressive stress, in which the monomer is the ground state.

#### **Experimental section:**

**9-(1-Naphthyl)anthracene (1a).** Yield 90%. <sup>1</sup>H NMR (400 MHz, CDCl<sub>3</sub>): δ 8.59 (s, 1H), 8.09 (d, J = 8.8Hz, 2H), 7.99-8.06 (m, 2H), 7.68-7.70 (m, 1H), 7.38-7.53 (m, 6H), 7.18-7.26 (m, 3H), 7.05-7.07 (d, 1H); FAB-MS: calcd MW: 304.4 ; m/z = 304[M<sup>+</sup> for C<sub>24</sub>H<sub>16</sub>]. The compound was synthesized according to the literature procedure.<sup>[1]</sup>

**9-(2-Naphthyl)anthracene (1b).**  $^1\text{H}$  NMR (400 MHz,  $\text{CDCl}_3$ ):  $\delta$  8.52 (s, 1H), 7.99-8.09 (m, 4H), 7.88-7.93 (m, 2H), 7.66-7.69 (m, 2H), 7.54-7.61 (m, 3H), 7.44-7.49 (m, 2H), 7.29-7.34 (m, 2H); FAB-MS: calcd MW: 304.4 ;  $m/z = 304$  [ $\text{M}^+$  for  $\text{C}_{24}\text{H}_{16}$ ]. The compound was synthesized according to the literature procedure.<sup>[1]</sup>

**9-(1-Naphthyl)-10-(bromo)anthracene (2a).** yield 91%.  $^1\text{H}$  NMR (400 MHz,  $\text{CDCl}_3$ ):  $\delta$  8.63-8.66 (d, 2H), 7.98-8.07 (m, 2H), 7.38-7.70 (m, 7H), 7.16-7.29 (m, 3H), 7.04 (m, 1H); FAB-MS: calcd MW, 383.3,  $m/z = 384$  [ $\text{M}^+$  for  $\text{C}_{24}\text{H}_{15}\text{Br}$ ]. The compound was synthesized according to the literature procedure.<sup>[1]</sup>

**9-(2-Naphthyl)-10-(bromo)anthracene (2b).** yield 89%.  $^1\text{H}$  NMR (400 MHz,  $\text{CDCl}_3$ ):  $\delta$  8.61-8.63 (d,  $J = 8.8\text{Hz}$ , 2H), 7.99-8.075 (m, 2H), 7.84-7.89 (m, 2H), 7.64-7.66 (d,  $J = 8.8\text{Hz}$ , 2H), 7.56-7.60 (m, 4H), 7.50-7.52 (m, 1H), 7.32-7.35 (m, 2H); FAB-MS: calcd MW, 383.3,  $m/z = 384$  [ $\text{M}^+$  for  $\text{C}_{24}\text{H}_{15}\text{Br}$ ]. The compound was synthesized according to the literature procedure.<sup>[1]</sup>

#### The X-ray diffraction of the film of 4a, 4b, 4c and 4d:

All the evaporated film of **4a**, **4b**, **4c** and **4d** show only a broad halo in their X-ray diffraction patterns (see supporting information) indicates that they form uniform amorphous films by vacuum deposition.

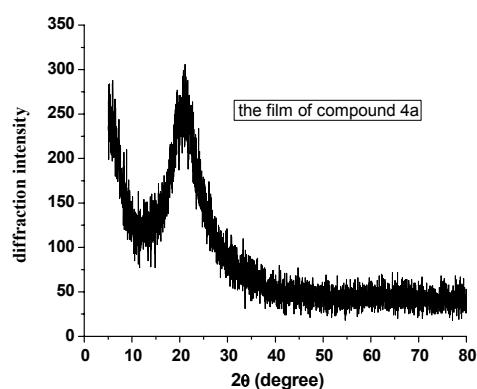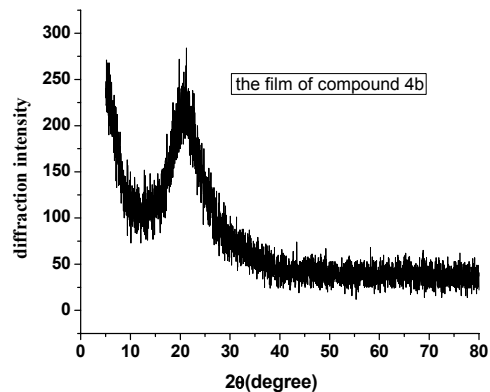

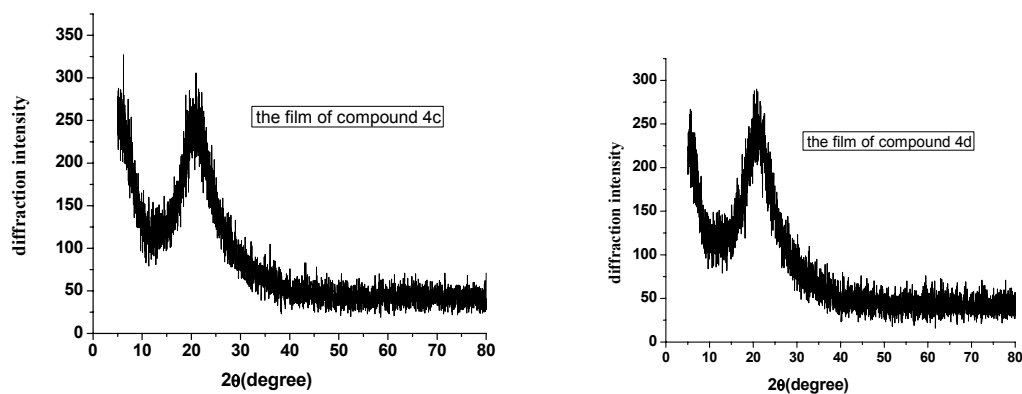

### The DSC of compound 4a and 4b

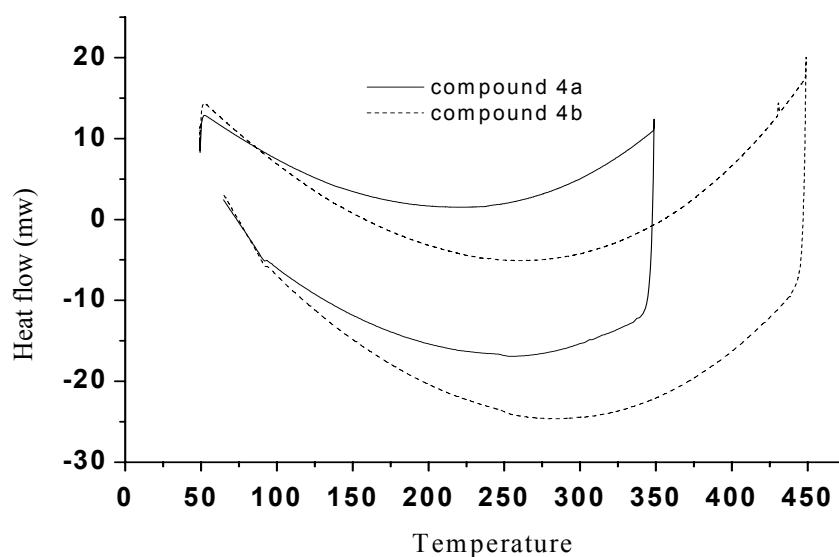

Fig. 1 The DSC spectra (differential scanning calorimetry) of the compound **4a** and **4b**. (20mg sample was added to the pan, then it is heated up to 350 °C or (450 °C )at 20 °C/min and go through a quick cooling at 50 °C/min by the ice-bath, then scan it and collect the data).

Reference:

[1] S. R.Conley, L. L. Cosimbescu, W. B.Vreeland, *U.S. Pat. Appl. Publ.* **2003**, U.S.

20050245752
